# Supplementary material for: Escherichia coli O157:H7 Converts Plant-Derived Choline to Glycine Betaine for Osmoprotection during Pre- and Post-harvest Colonization of Injured Lettuce Leaves
Source: PubMed Central journal article supplement (PMC5727454; doi:10.3389/fmicb.2017.02436), 2017-12-08
Supplement: Data_Sheet_1.pdf [file Data_Sheet_1.pdf]

**Table S1. Primers used in this study**

| Utility                   | primer name   | Sequence (5'-3')                                                       | Reference |
|---------------------------|---------------|------------------------------------------------------------------------|-----------|
| Site-directed mutagenesis |               |                                                                        |           |
|                           | betT_pKD3-FWD | ATGATTCCCGCGCCATATGCAGACATGGCGCGGTTTTATGCAATAACAAGTGTAGGCTGGAGCTGCTTC  |           |
|                           | betA_pKD3-REV | CTGTCCCATAACCTGGAACGGTAACCTCAATCTGATCGGTTCCGAGATGGGAATTAGCCATGGTCC     |           |
|                           | otsB_pKD4-FWD | AGCGCGTTCTGCGCAACACAATAAGAAAAGAGAAGGAGGAGAACCGGGTGGTGTAGGCTGGAGCTGCTTC |           |
|                           | otsA_pKD4-REV | GTGAGGTCGATGTGCTGTTAGTTCCACTTACGGGAGATTAACCGCTCCTAATGGGAATTAGCCATGGTCC |           |
| Confirmation              |               |                                                                        |           |
|                           | betT_F        | CAAAAGCAGGAGAAATACATTTAATATAC                                          |           |
|                           | betA_R        | GTCACTATGAAGCATGAGAGTTAC                                               |           |
|                           | otsB_F        | TGTTATCTCCGCTGCGTTT                                                    |           |
|                           | otsB_R        | AAAAGCGGCCATTTCCACC                                                    |           |
|                           | otsA_F        | GGCTATGACTGGGCACAACA                                                   |           |
|                           | otsA_R        | TGCCTACGGTGAGTTAAGCG                                                   |           |
| Plasmid Construction      |               |                                                                        |           |
|                           | otsSpeI-F     | ACTGACACTAGTTCGCACCAAAATTATTATCTTTGTTCTCTCTGGC,                        |           |
|                           | otsSacI-R     | ACTGACGAGCTCCTACACAAGCTTAGGAAAGGTAGCAACTTTATCG                         |           |
|                           | BetSpeI-F     | ACTGACACTAGTTCACGCGTCCGGGAACATC                                        |           |
|                           | BetSacI-R     | ACTGACGAGCTCTCAGTTCAATCACGACTCATTTTTTCGCTCTTAC                         |           |

## osmoprotectants as sole carbon source

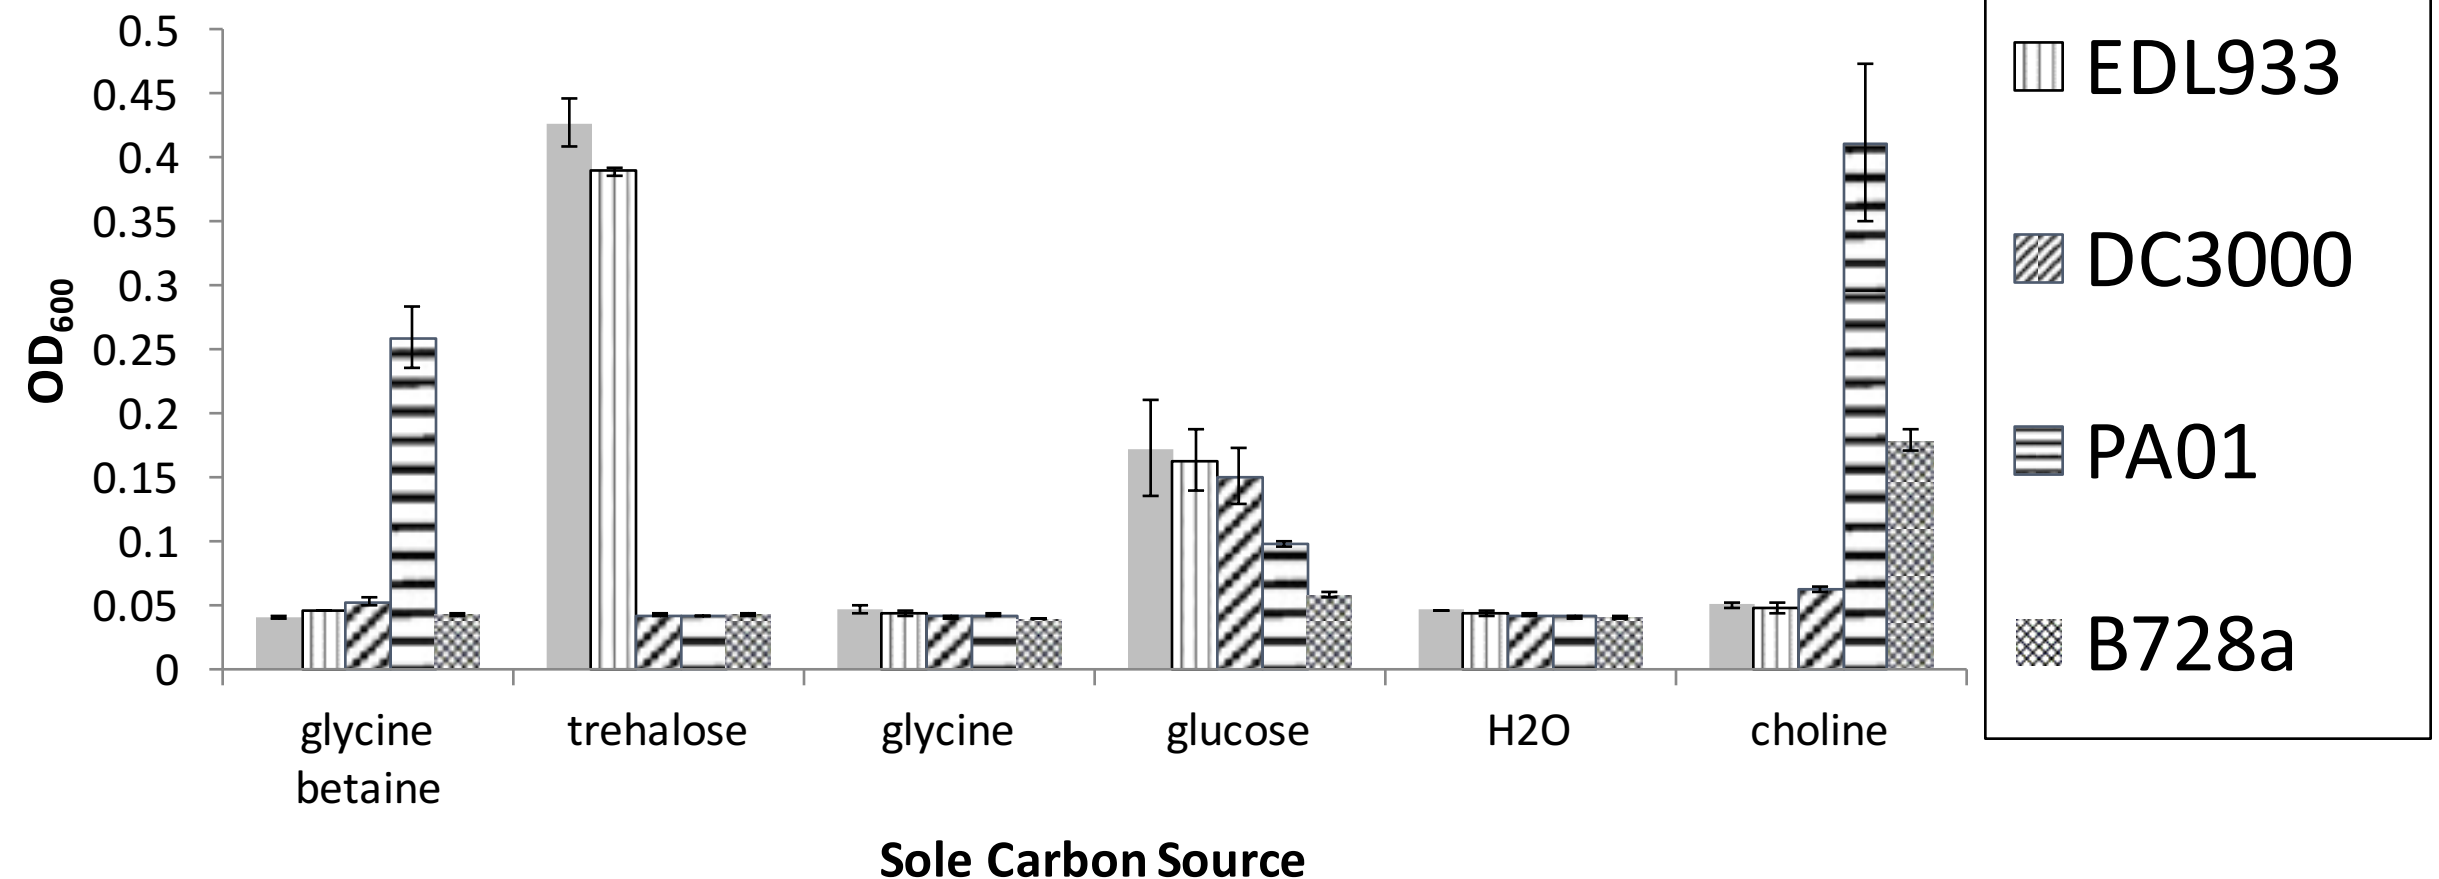

**Figure S1.** The osmoprotectants choline and glycine betaine do not serve as sole carbon sources for *E. coli* O157:H7 TW14588 and EDL933 in M9 minimal medium. Trehalose is a growth substrate but periplasmic breakdown during import was reported to prevent its use as an exogenously supplied osmoprotectant during osmotic stress in *E. coli* K12 (Klein, Ehmann, and Boos, 1991). *Pseudomonas syringae* B728a and *P. aeruginosa* PAO served as positive control strains for osmoprotectant consumption, while *Pseudomonas syringae* pv. tomato DC3000 served as an additional control. Growth was measured as OD<sub>600</sub> of culture after 48 h @ 28°C. Glycine, glycine betaine, and choline were provided at a final concentration of 30 mM. Trehalose and Glucose were provided at a final concentration of 5 mM.

### Reference:

Klein, W., Ehmann, U., and Boos, W. (1991). The repression of trehalose transport and metabolism in *Escherichia coli* by high osmolarity is mediated by trehalose-6-phosphate phosphatase. *Res. Microbiol.* 142, 359–371.
